# Supplementary material
Source: PubMed Central journal article supplement (PMC3234708)
Supplement: supp_M111.279851_jbc.M111.279851-1.pdf [file supp_M111.279851_jbc.M111.279851-1.pdf]

**Supplementary material for**

**Outer membrane targeting of secretin PulD relies on disordered domain recognition by a dedicated chaperone**

**Nicholas N. Nickerson<sup>1,2</sup>, Tommaso Tosi<sup>3,4,5</sup>, Andréa Dessen<sup>3,4,5</sup>, Bruno Baron<sup>6,7</sup>, Bertrand Raynal<sup>6,7</sup>, Patrick England<sup>6,7</sup>, and Anthony P. Pugsley<sup>1,2</sup>**

From the <sup>1</sup>Institut Pasteur, Molecular Genetics Unit, Microbiology Department, rue du Dr. Roux, 75015 Paris, France; <sup>2</sup>CNRS URA2172, rue du Dr. Roux, 75015 Paris, France; <sup>3</sup>Université de Grenoble I, Bacterial Pathogenesis Group, Institut de Biologie Structurale, rue Jules Horowitz, 38027 Grenoble, France; <sup>4</sup>CNRS UMR 5075, rue Jules Horowitz, 38027 Grenoble, France; <sup>5</sup>Commissariat à l'Énergie Atomique, rue Jules Horowitz, 38027 Grenoble, France; <sup>6</sup>Institut Pasteur, Biophysics of Macromolecules and their Interactions Platform, Proteopole and Structural Biology and Chemistry Department, rue du Dr. Roux, 75015 Paris, France; <sup>7</sup>CNRS URA2185, rue du Dr. Roux, 75015 Paris, France.

Running head: Dedicated chaperone binds unstructured domain

Address correspondence to: Anthony P. Pugsley, Institut Pasteur, 28 rue du Dr. Roux, 75724 Paris Cedex15, France. Tel: ++33 140613762; E-mail: [max@pasteur.fr](mailto:max@pasteur.fr)

**Supplementary Figure S1.** The shift in the intrinsic tryptophan fluorescence spectra of 1  $\mu\text{M}$  PulS (sample excited at 295 nm and emission recorded between 310-400 nm) as a function of Sdom titration shows a clear shift in fluorescence until a molar ratio of 1:1 is reached. The shift in tryptophan fluorescence measured by the ratio of 320/360 nm and plotted versus Sdom concentration gave an affinity of  $12.6 \text{ nM} \pm 6 \text{ nM}$ .

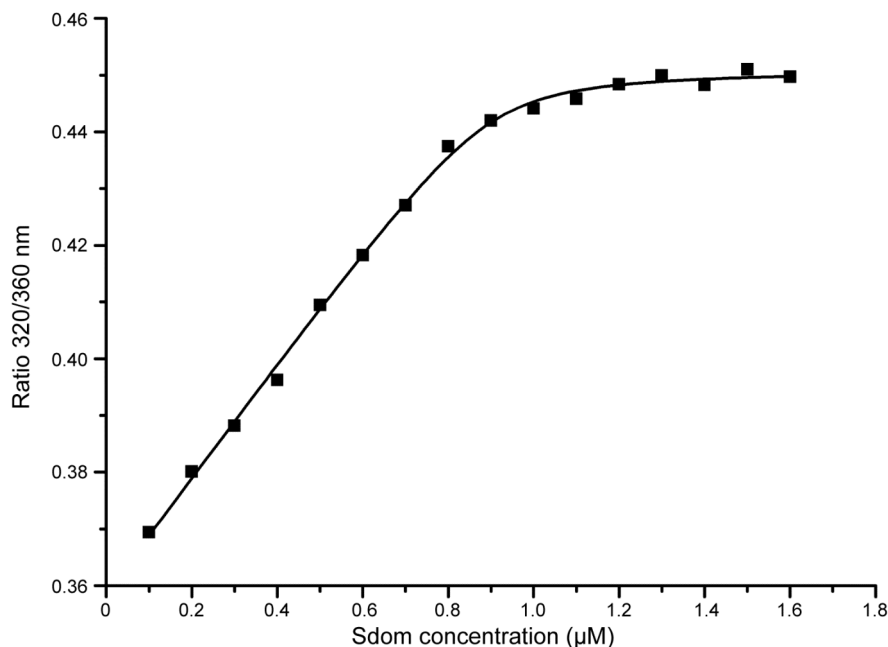

**Supplementary Figure S2.** PulS and the PulS Sdom complex are mainly  $\alpha$ -helical. Far-UV CD spectra and fitted curves of 100  $\mu\text{M}$  PulS (open circles) and the 100  $\mu\text{M}$  PulS Sdom complex (solid circles) from 190-240 nm. The inset shows the relative secondary structure predicted from the deconvolution using the CDSSTR routine of the DICHROWEB server run on the SP175 reference dataset.

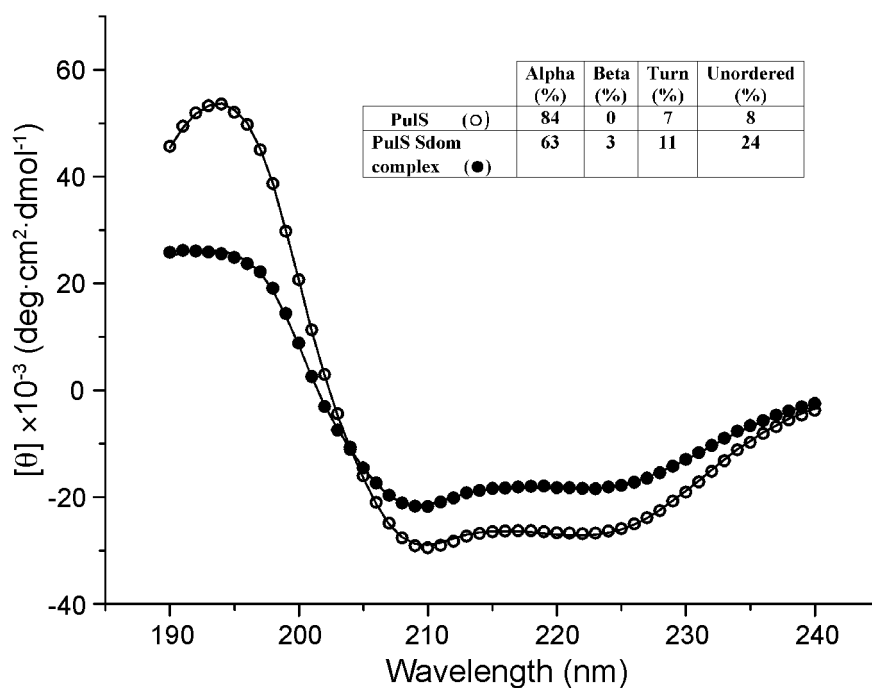

**Supplementary Figure S3.** Formation of complexes between PulS and SdomA or SdomB peptides. Size exclusion chromatography elution profiles with SdomA (A) or SdomB (B) on Superdex 75 column. Elution of 20  $\mu$ l of loaded sample corresponding to 40  $\mu$ M of protein was monitored at  $A_{280}$  nm.

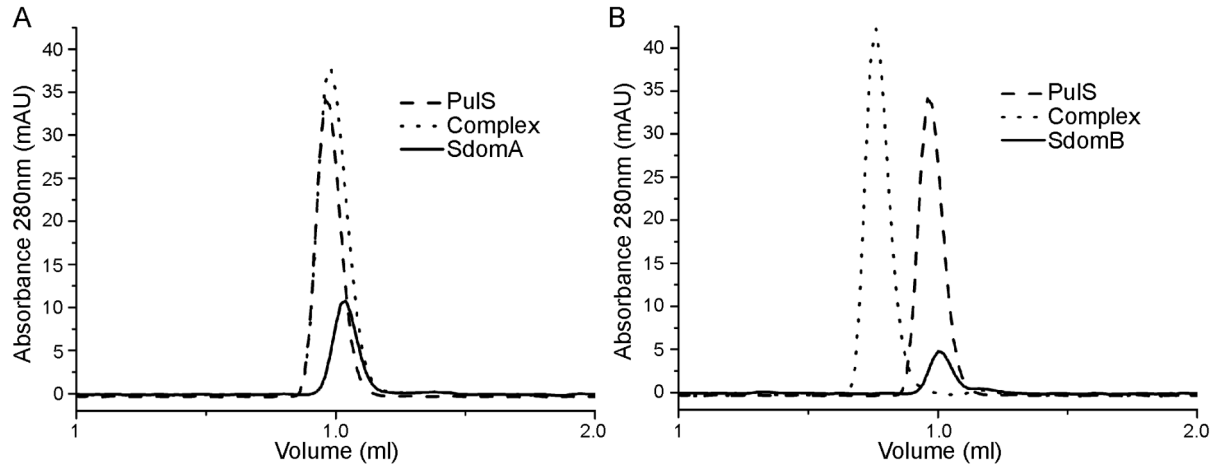

**Supplementary Figure S4.** Real-time SPR sensorgrams of the PulS-Sdom interaction. Representative sensorgrams of the real time association and dissociation profiles corresponding to the injection of PulS +/- competitor over the surface-immobilized MalE antibody loaded with MalE-Sdom. SPR signal (RU) is plotted against time for the indicated concentrations of competitor (1.12 nM – 286 nM, Sdom).

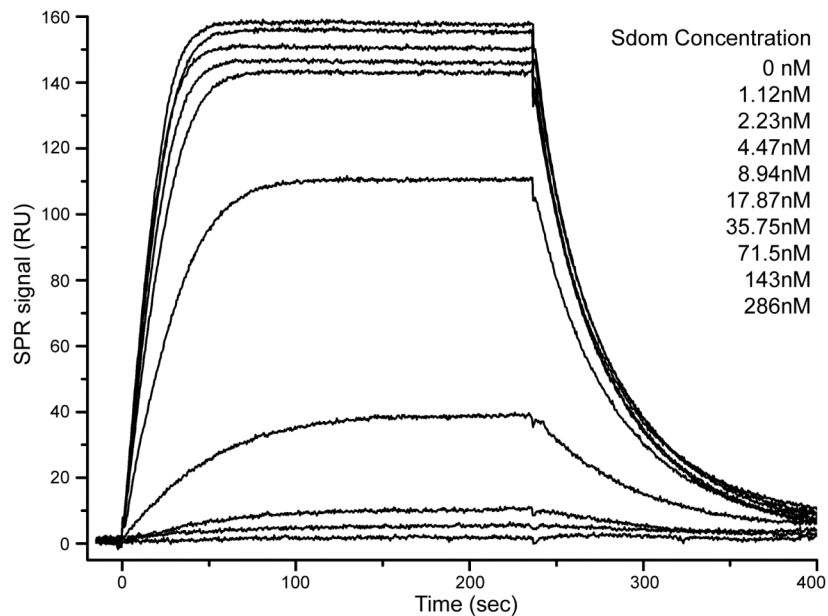

**Supplementary Figure S5.** PulD  $\Delta$ SdomA is localized in the outer membrane. Membranes from strains producing PulD (**A**) and PulD  $\Delta$ SdomA (**B**) in the presence of PulS were separated by floatation in a sucrose gradient (1). Fractions were analyzed by SDS-PAGE and immunoblotting with PulD-, OmpA- (outer membrane marker) and PspA- (inner membrane marker) specific antibodies. Mu, PulD multimer; Mo, PulD monomer.

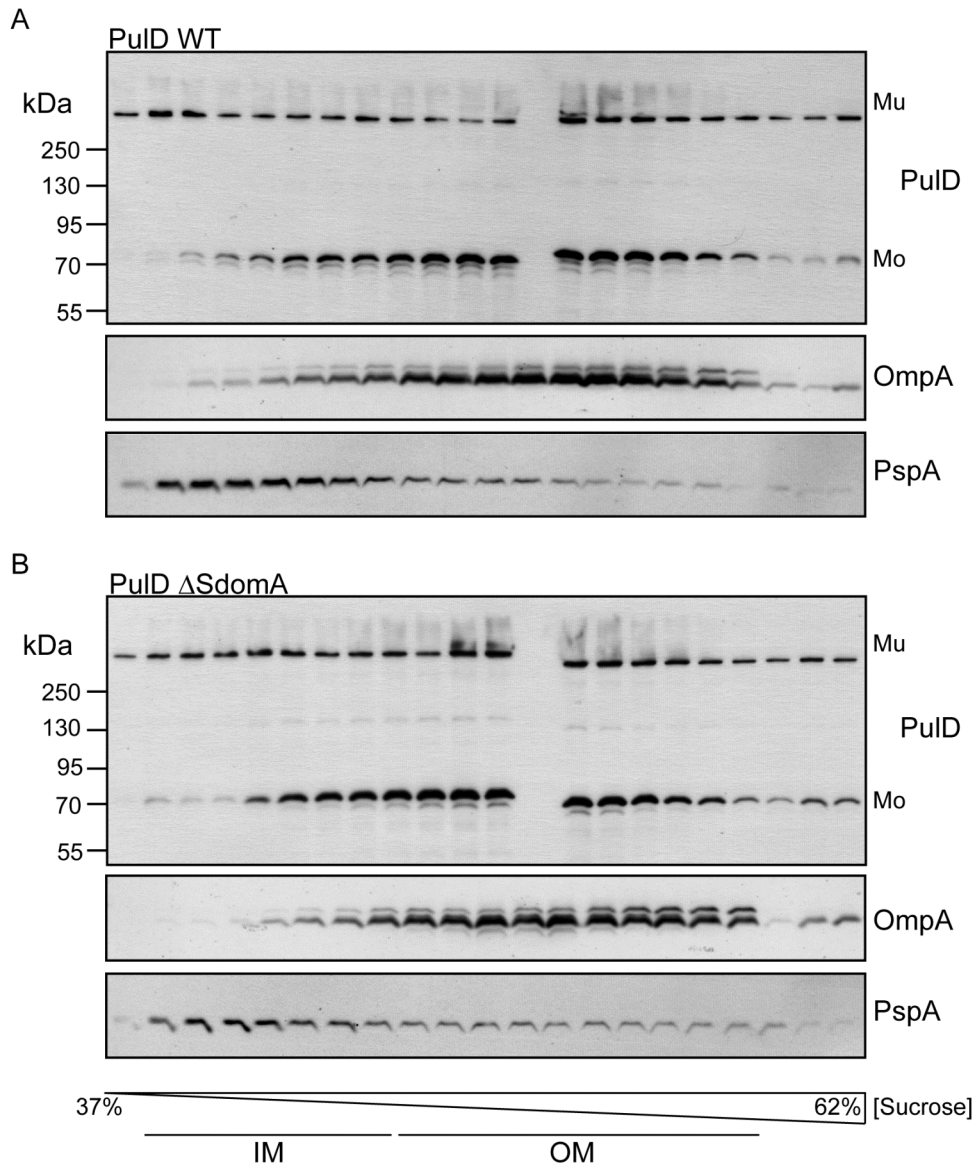

1. Robichon, C., Vidal-Ingigliardi, D., and Pugsley, A. P. (2005) *J. Biol. Chem.* **280**, 974-983

**Supplementary Table 1.** Primer Sequences

| Name  | Sequence <sup>a</sup> (5'-3')                                                                                                              | Restriction site |
|-------|--------------------------------------------------------------------------------------------------------------------------------------------|------------------|
| PNN19 | ccctacgtaCAGCAAATCGCCCCGACAAC                                                                                                              | SnaBI            |
| PNN12 | cccaagcttCTATTTATTGTCGCGCAGGC                                                                                                              | HindIII          |
| PNN28 | cgcgatccCGCCCGACGGTGATCCGC                                                                                                                 | BamHI            |
| PNN29 | cccaagcttTCATAGATTGCCTCCCAGATTG                                                                                                            | HindII           |
| PNN55 | ccggaattcCTGGTGCCGCGCGGCAGCATCCGCGACCGCGACGAG                                                                                              | EcoRI            |
| PNN56 | cccaagcttTCACAGATTGAACGCGTCGATAGC                                                                                                          | HindIII          |
| PNN57 | ccggaattcCTGGTGCCGCGCGGCAGCAATCAGGATCTGCTGGAGATC                                                                                           | EcoRI            |
| PNN58 | cccaagcttTCACAGCATCGCGTCGTTGTTCTC                                                                                                          | HindIII          |
| PNN67 | GGTGATCCGCGACCGCGACAATCAGGATCTGCTGGAGATCTAC                                                                                                |                  |
| PNN68 | GTAGATCTCCAGCAGATCCTGATTGTGCGGGTCGCGGATCACC                                                                                                |                  |
| PNN69 | GGTGATCCGCGACCGCGACgagaattcgagctcgaacaacaacaataacaat-<br>aacaacaacctcgggatcgaggaaggattcagaattcggatcctctagagtcAATCAGGA-<br>TCTGCTGGAGATCTAC |                  |
| PNN70 | GTAGATCTCCAGCAGATCCTGATTgactctagaggatccgaattctgaaatcct-<br>tcctcgatcccagggtgtgtattgtattgtgtgtgttcgagctcgaattctcGTCGCGGT-<br>CGCGGATCACC    |                  |

<sup>a</sup> Lower case letters correspond to either the sequence of restriction enzymes or the linker region from pMal-c2 vector and upper case letters denote sequence of target gene.

**Supplementary Table 2.** Peptides identified by mass spectrometry

| Experimental, m/z (Da)                           | Charged State | Theoretical MW (Da) | Standard Deviation (%) | His-Sdom <sup>a</sup> |     | PulD <sup>b</sup> |     | Modification | Sequence                     |
|--------------------------------------------------|---------------|---------------------|------------------------|-----------------------|-----|-------------------|-----|--------------|------------------------------|
|                                                  |               |                     |                        | Start                 | End | Start             | End |              |                              |
| <b>Sdom Digestion</b>                            |               |                     |                        |                       |     |                   |     |              |                              |
| <b>Peptides identified without modifications</b> |               |                     |                        |                       |     |                   |     |              |                              |
| 2298.186                                         | 3             | 6886.424            | 0.0742                 | 18                    | 77  | 595               | 654 | -            | RDRDEYRQASSG....AFRQVSAIDAF  |
| 2952.103                                         | 3             | 8851.618            | 0.0188                 | 1                     | 77  | 590               | 654 | -            | MRGSHHHHHHGS....AFRQVSAIDAF  |
| 3108.380                                         | 2             | 6210.685            | 0.0653                 | 18                    | 70  | 595               | 647 | -            | RDRDEYRQASSG....YPRQDTAAFRQV |
| 3167.821                                         | 2             | 6323.844            | 0.1544                 | 17                    | 70  | 594               | 647 | -            | IRDRDEYRQASS....YPRQDTAAFRQV |
| 3801.562                                         | 1             | 3795.118            | 0.1430                 | 35                    | 67  | 612               | 644 | -            | NDAQSKQRGKEN....LEIYPRQDTAAF |
| 3887.156                                         | 2             | 7792.428            | 0.2589                 | 1                     | 67  | 590               | 644 | -            | MRGSHHHHHHGS....LEIYPRQDTAAF |
| 4055.160                                         | 1             | 4064.338            | 0.2512                 | 17                    | 51  | 594               | 628 | -            | IRDRDEYRQASS....KQRGKENNDAML |
| 6326.702                                         | 1             | 6323.844            | 0.0292                 | 17                    | 70  | 594               | 647 | -            | IRDRDEYRQASS....YPRQDTAAFRQV |
| 6383.491                                         | 1             | 6386.855            | 0.0685                 | 1                     | 55  | 590               | 650 | -            | MRGSHHHHHHGS....KENNDAMLNQLD |
| <b>Peptides identified with modifications</b>    |               |                     |                        |                       |     |                   |     |              |                              |
| 3816.642                                         | 1             | 3795.118            | 0.0648                 | 35                    | 67  | 612               | 644 | Sodium       | NDAQSKQRGKEN....LEIYPRQDTAAF |
| 3872.044                                         | 1             | 3795.118            | 0.0517                 | 35                    | 67  | 612               | 644 | Potassium    | NDAQSKQRGKEN....LEIYPRQDTAAF |
| 3929.623                                         | 2             | 7792.428            | 0.1669                 | 1                     | 67  | 590               | 644 | Potassium    | MRGSHHHHHHGS....LEIYPRQDTAAF |
| 3973.111                                         | 1             | 3951.178            | 0.0520                 | 18                    | 51  | 595               | 628 | Sodium       | RDRDEYRQASSG....KQRGKENNDAML |
| 4231.715                                         | 1             | 4178.569            | 0.1455                 | 35                    | 70  | 612               | 647 | Sodium       | NDAQSKQRGKEN....YPRQDTAAFRQV |
| 4302.385                                         | 2             | 8518.274            | 0.0763                 | 1                     | 74  | 590               | 651 | Potassium    | MRGSHHHHHHGS....DTAAFRQVSAAI |
| 5895.253                                         | 1             | 5827.234            | 0.1850                 | 18                    | 67  | 595               | 644 | Potassium    | RDRDEYRQASSG....LEIYPRQDTAAF |
| 7649.621                                         | 1             | 7568.214            | 0.0324                 | 17                    | 83  | 594               | 660 | Potassium    | IRDRDEYRQASS....AAIDAFNLGGNL |
| <b>Sdom-PulS complex digestion</b>               |               |                     |                        |                       |     |                   |     |              |                              |
| <b>Peptides identified without modifications</b> |               |                     |                        |                       |     |                   |     |              |                              |
| 2144.874                                         | 1             | 2149.434            | 0.2596                 | 56                    | 74  | 633               | 651 | -            | LEIYPRQDTAAFRQVSAAI          |
| 2182.752                                         | 3             | 6553.080            | 0.1198                 | 18                    | 74  | 595               | 651 | -            | RDRDEYRQASSG....DTAAFRQVSAAI |
| 3170.020                                         | 2             | 6323.844            | 0.2237                 | 17                    | 70  | 594               | 647 | -            | IRDRDEYRQASS....YPRQDTAAFRQV |
| 3800.958                                         | 1             | 3795.118            | 0.1271                 | 35                    | 67  | 612               | 644 | -            | NDAQSKQRGKEN....LEIYPRQDTAAF |
| 4054.650                                         | 1             | 4064.338            | 0.2638                 | 17                    | 51  | 594               | 628 | -            | IRDRDEYRQASS....KQRGKENNDAML |
| <b>Peptides identified with modifications</b>    |               |                     |                        |                       |     |                   |     |              |                              |
| 2175.131                                         | 3             | 6500.014            | 0.0097                 | 1                     | 56  | 590               | 633 | Sodium       | MRGSHHHHHHGS....ENNDAMLNQLDL |
| 3640.063                                         | 2             | 7226.847            | 0.0726                 | 17                    | 79  | 594               | 656 | Sodium       | IRDRDEYRQASS....RQVSAIDAFNL  |
| 3871.206                                         | 1             | 3795.118            | 0.0733                 | 35                    | 67  | 612               | 644 | Potassium    | NDAQSKQRGKEN....LEIYPRQDTAAF |
| 7669.001                                         | 1             | 7568.214            | 0.2850                 | 17                    | 83  | 594               | 660 | Potassium    | IRDRDEYRQASS....AAIDAFNLGGNL |

## Dedicated chaperone binds unstructured domain

Samples were desalted on C18- $\mu$ ZipTip (Millipore) and eluted directly onto a 96-well stainless steel MALDI target plate (ABSCIEX) with 0.5  $\mu$ l of CHCA matrix (2.5 mg/ml in 70% CAN / 30 % H<sub>2</sub>O / 0.1 % TFA). MS spectra were acquired on the 4800 Proteomics Analyzer (ABSCIEX, USA) using positive-ion linear mode, calibrated using the calMix1 kit of LaserBio Labs (bovine insulin [M+H]<sup>+</sup> = 5734.8; horse heart cytochrome C [M+H]<sup>+</sup> = 12361; horse myoglobin [M+H]<sup>+</sup> = 16952.5). Sample mass spectra were acquired using a mass range window of 2000-12000 m/z and an average of 3000 laser shots per spectrum. Mass search against undigested protein sequence was performed using GPMAW 9.0 software (Lighthouse, Odense, Denmark) with the following parameters: thermolysin, average mass ([M+H]<sup>+</sup>), mass tolerance of 0.05 %, possibility of multi-charged ions and Na<sup>+</sup> and K<sup>+</sup> adducts.

<sup>a</sup> Amino acid residue corresponding to His-tagged Sdom peptide identified by mass spectrometry.

<sup>b</sup> Corresponding amino acid residue of PulD.
